# Supplementary material
Source: publisher figshare collection journal article supplement (https://sage.figshare.com/ndownloader/files/12691751)
Supplement: Supplementary file 1 [file 12691751]

Veterinary Pathology: Supplemental Materials.  
Bolf et al. Tropical Keratopathy (Florida Spots) in Cats.

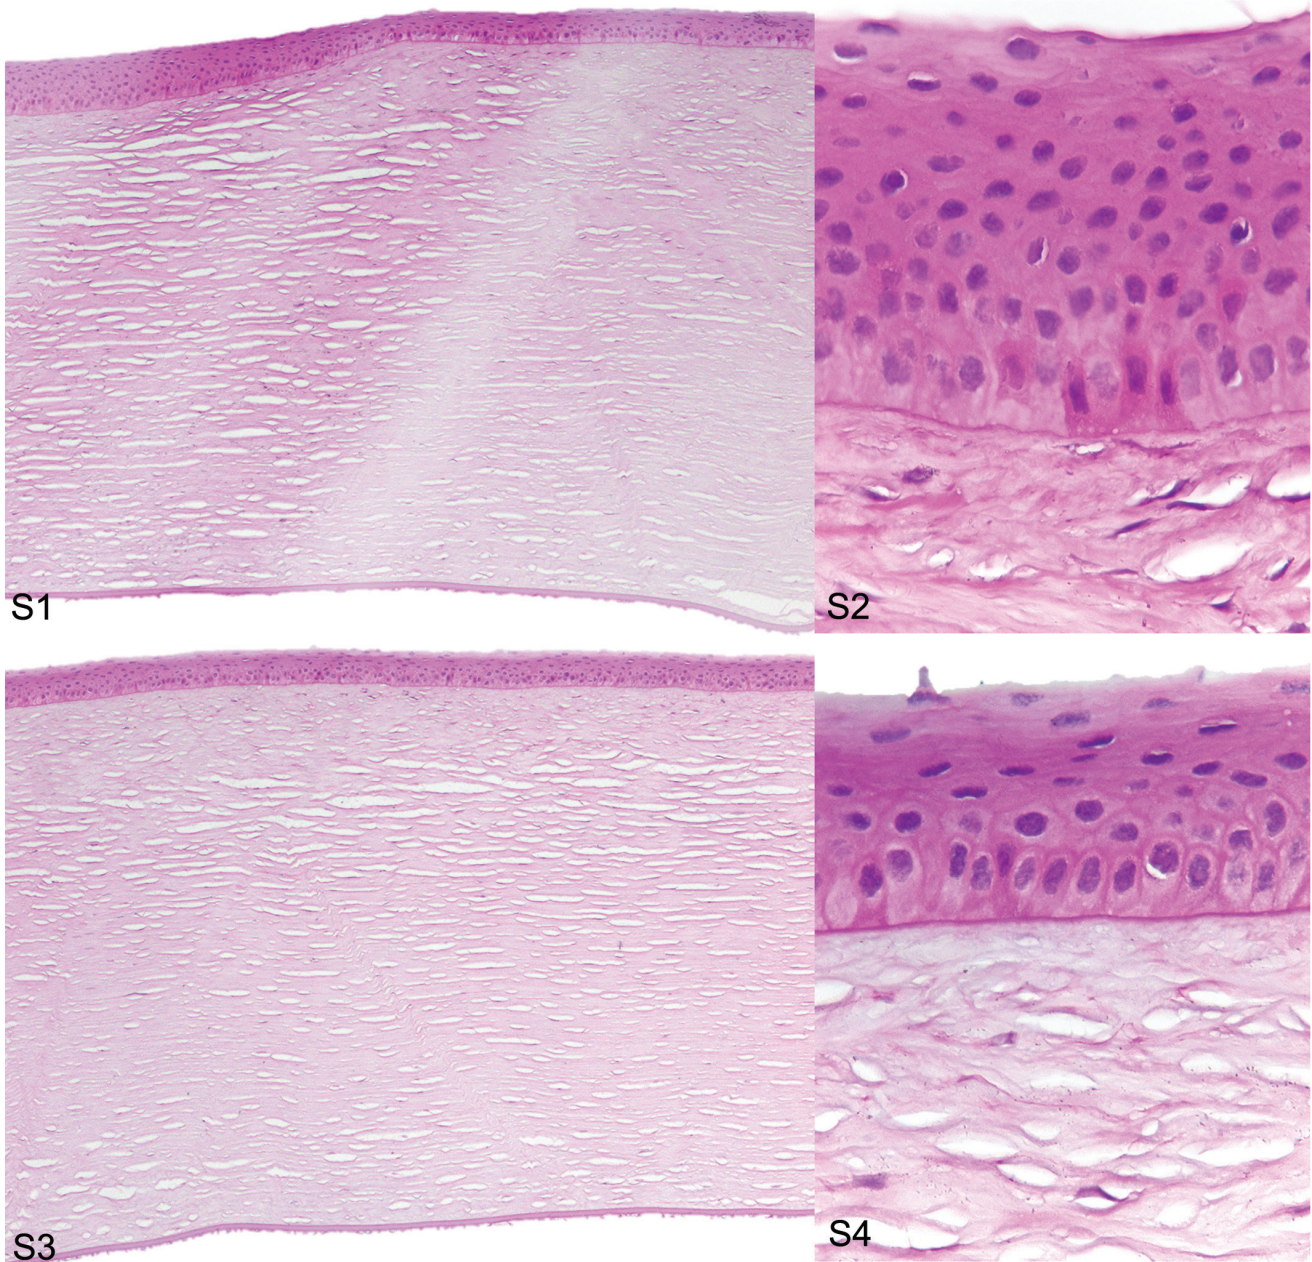

Supplemental Figures S1-S2. Tropical keratopathy, right eye, cornea, cat, Case 3. Supplemental Figure S1. From right (normal area) to left (lesion), progressive epithelial hyperplasia, paralleled by progressive upper stromal collagen condensation compared with normal deep stroma, There is decrease in overall corneal thickness mainly due to stromal thickness reduction. Hematoxylin eosin (HE). Supplemental Figure S2. Detail from an area with the lesion in the previous image, showing epithelial hyperplasia (up to 12 epithelial cell layers) and upper corneal stromal condensation with thicker collagen fibrils and reduction of interlamellar spaces/clefts. The clefts in the right side of the stroma potentially represent the non-affected stroma at the margin of the lesion. HE. Supplemental Figures S3-S4. Left eye, cornea (control), case 3 Supplemental Figure S3. Uniform thickness of the corneal epithelium with no changes in the corneal stroma and Descemet membrane. HE. Supplemental Figure S4. Normal corneal epithelium with 6 to 8 cell layer, a uniform intact basal lamina and normal upper corneal stroma with keratocytes nuclei and clefts that appear during normal histological processing. HE.

Veterinary Pathology: Supplemental Materials.  
Bolfá et al. Tropical Keratopathy (Florida Spots) in Cats.

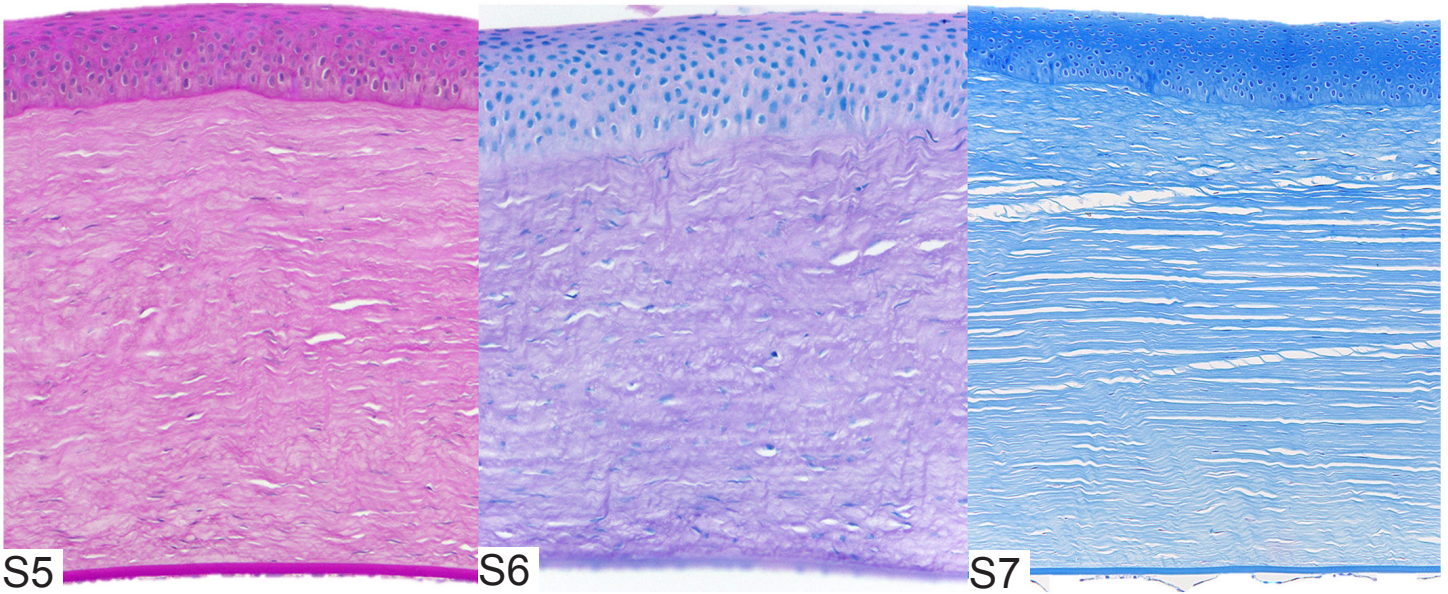

Supplemental Figures S5-7. Tropical keratopathy, cat. Supplemental Figure S5. Case 5, left eye. Normal epithelial basal lamina and Descemet's membrane. Periodic acid-Schiff. Supplemental Figure S6. Case 5, left eye. No organisms have been detected. Acid-fast stain. Supplemental Figure S7. Case 3, right eye. Absence of acid polysaccharide accumulations in the stroma. Alcian blue stain.

# Veterinary Pathology: Supplemental Materials.

## Bolfà et al. Tropical Keratopathy (Florida Spots) in Cats.

**Supplemental Table S1.** Feline cases and lesions selected for the study

|                           | Case No. | Year collected | Origin      | Age         | Sex    | Breed       | Lesion location       | Biopsy for HE |                    | Biopsy for TEM |         | Biopsy for SAXS |         |
|---------------------------|----------|----------------|-------------|-------------|--------|-------------|-----------------------|---------------|--------------------|----------------|---------|-----------------|---------|
|                           |          |                |             |             |        |             |                       | Lesion        | Normal             | Lesion         | Normal  | Lesion          | Normal  |
| <b>Cases with lesions</b> | 1        | 2016           | St. Kitts   | young adult | male   | DSH*        | OS <sup>#</sup>       | 1             | 1 <sup>&amp;</sup> | No             | No      | No              | No      |
|                           | 2        | 2016           | St. Kitts   | adult       | female | DSH         | OD <sup>**</sup> , OS | 2             | 2 <sup>&amp;</sup> | 3: 2OS, 1 OD   | 2: OD   | 3: 2OS, 1 OD    | 2: OD   |
|                           | 3        | 2016           | St. Kitts   | 3 years     | male   | DSH         | OD                    | 1             | 1 <sup>&amp;</sup> | No             | No      | No              | No      |
|                           | 4        | 2017           | St. Kitts   | adult       | female | DSH         | OD, OS                | 2             | 2 <sup>&amp;</sup> | 2: 1 OS, 1 OD  | 1: OS   | 2: 1 OS, 1 OD   | 1: OS   |
|                           | 5        | 2017           | St. Kitts   | 6 years     | male   | DSH         | OD, OS                | 2             | 2 <sup>&amp;</sup> | No             | No      | No              | No      |
|                           | 6        | 2017           | St. Kitts   | 6 years     | female | Siamese mix | OD                    | 1             | 1 <sup>&amp;</sup> | No             | No      | No              | No      |
| <b>Controls</b>           | 7        | 2016           | New Zealand | adult       | male   | DSH         | None                  | No            | 1                  | No             | 2: 1 OS | 1: OS           | 2: 1 OS |
|                           | 8        | 2017           | St. Kitts   | 6 mths      | female | Siamese     | None                  | No            | 1                  | No             | No      | No              | No      |

\* domestic shorthair cat

<sup>#</sup> left eye

<sup>\*\*</sup> right eye

<sup>&</sup> normal areas adjacent to the lesion in the same biopsy

Veterinary Pathology: Supplemental Materials.  
Bolfá et al. Tropical Keratopathy (Florida Spots) in Cats.

Supplemental Table S3: Light microscopy analysis data

| Case No.   | Epithelial thickness - number of layers |                       | Corneal thickness/stromal thickness (micrometers) |                 | Percent reduction cornea/stroma |
|------------|-----------------------------------------|-----------------------|---------------------------------------------------|-----------------|---------------------------------|
|            | Lesion (up to) *                        | Normal area (range) * | Lesion #                                          | Normal area #   |                                 |
| 1          | 13                                      | 6-9                   | 941.05 / 857.66                                   | 986.59 / 901    | 4.6 / 4.8                       |
| 2          | 15                                      | 6-9                   | 788.11 / 687.37                                   | 959.74 / 882.39 | 17.9 / 22.1                     |
| 3          | 12                                      | 6-8                   | 448.09 / 339.5                                    | 530.34 / 473.69 | 15.5 / 28.7                     |
| 4          | 10                                      | 5-7                   | 681.45 / 633.93                                   | 732.2 / 684.56  | 6.9 / 7.4                       |
| 5          | 14                                      | 5-8                   | 734.8 / 609.7                                     | 768.41 / 719.37 | 4.4 / 4.3                       |
| 6          | 5                                       | 3                     | 611.26 / 582.25                                   | 637.72 / 608.6  | 4.1 / 4.3                       |
| 7          | -                                       | 6-8                   | -                                                 | 786.92 / 715.04 | -                               |
| 8          | -                                       | 6-9                   | -                                                 | 877.55 / 819.13 | -                               |
| *P = 0.009 |                                         |                       | # No statistical significance difference          |                 |                                 |

The following Supplemental Tables are available online as Excel files:

Supplemental Table S2. SAXS Data: d-spacing, diameter and OI

Supplemental Table S4. ImageJ Data on fibril diameters
